# Supplementary material
Source: PubMed Central journal article supplement (PMC3957342)
Supplement: DS_10.1177_0022034514520708.pdf [file DS_10.1177_0022034514520708.pdf]

# RESEARCH REPORTS

## Clinical

S.M. Levy<sup>1,2\*</sup>, J.J. Warren<sup>1</sup>, K. Phipps<sup>3</sup>,  
E. Letuchy<sup>2</sup>, B. Broffitt<sup>1</sup>, J. Eichenberger-Gilmore<sup>1,4</sup>,  
T.L. Burns<sup>2,5</sup>, G. Kavand<sup>1</sup>, K.F. Janz<sup>2,6</sup>, J.C. Torner<sup>2</sup>,  
and C.A. Pauley<sup>1,4</sup>

<sup>1</sup>Department of Preventive & Community Dentistry, University of Iowa College of Dentistry, Iowa City, IA, USA; <sup>2</sup>Department of Epidemiology, University of Iowa College of Public Health, Iowa City, IA, USA; <sup>3</sup>Oral Health Research Consultant, Morro Bay, CA, USA; <sup>4</sup>Institute for Clinical and Translational Sciences, University of Iowa, Iowa City, IA, USA; <sup>5</sup>Department of Pediatrics, University of Iowa College of Medicine, Iowa City, IA, USA; and <sup>6</sup>Department of Health and Human Physiology, University of Iowa College of Liberal Arts, Iowa City, IA, USA; \*corresponding author, [steven-levy@uiowa.edu](mailto:steven-levy@uiowa.edu)

# Effects of Life-long Fluoride Intake on Bone Measures of Adolescents: A Prospective Cohort Study

*J Dent Res* DOI: 10.1177/0022034514520708

## APPENDIX

**Appendix Table.** Descriptive Statistics for Fluoride, Calcium, and Vitamin D Intake and MVPA by Gender

| Variable                                                    | N   | Mean     | SD     | Percentiles of Distribution |        |        |        |        |        |          |          |          |          |
|-------------------------------------------------------------|-----|----------|--------|-----------------------------|--------|--------|--------|--------|--------|----------|----------|----------|----------|
|                                                             |     |          |        | min                         | p1     | p5     | p10    | p25    | p50    | p75      | p90      | p99      | max      |
| <b>Females</b>                                              |     |          |        |                             |        |        |        |        |        |          |          |          |          |
| Cumulative fluoride intake AUC for birth to 15 yrs (mg/day) | 183 | 0.66     | 0.24   | 0.26                        | 0.28   | 0.36   | 0.38   | 0.48   | 0.63   | 0.82     | 0.96     | 1.53     | 1.54     |
| Calcium intake at age 15 yrs (mg/day)                       | 174 | 779.99   | 386.53 | 141.34                      | 190.03 | 297.84 | 355.67 | 497.67 | 724.81 | 964.74   | 1,251.25 | 2,398.59 | 2,507.89 |
| Vitamin D intake at age 15 yrs (IU/day)                     | 174 | 195.46   | 169.07 | 3.60                        | 9.60   | 27.60  | 48.00  | 92.40  | 149.40 | 252.00   | 364.80   | 760.80   | 1,370.40 |
| Actigraph MVPA (min/day)                                    | 131 | 26.23    | 17.09  | 1.75                        | 1.75   | 5.00   | 7.25   | 13.20  | 23.00  | 37.40    | 49.60    | 73.20    | 87.25    |
| <b>Males</b>                                                |     |          |        |                             |        |        |        |        |        |          |          |          |          |
| Cumulative fluoride intake AUC for birth to 15 yrs (mg/day) | 175 | 0.78     | 0.30   | 0.25                        | 0.29   | 0.38   | 0.45   | 0.57   | 0.71   | 0.96     | 1.23     | 1.62     | 1.85     |
| Calcium intake at age 15 yrs (mg/day)                       | 168 | 1,043.24 | 512.93 | 248.09                      | 256.08 | 381.37 | 495.29 | 676.83 | 955.19 | 1,226.50 | 1,855.85 | 2,755.32 | 2,977.02 |
| Vitamin D intake at age 15 yrs (IU/day)                     | 168 | 266.77   | 163.41 | 22.80                       | 24.00  | 57.60  | 88.80  | 145.20 | 234.00 | 343.20   | 524.40   | 730.80   | 753.60   |
| Actigraph MVPA (min/day)                                    | 140 | 38.41    | 19.33  | 3.20                        | 6.40   | 11.28  | 15.71  | 23.33  | 35.25  | 52.40    | 62.31    | 95.40    | 96.00    |

MVPA, moderate- and vigorous-intensity physical activity.

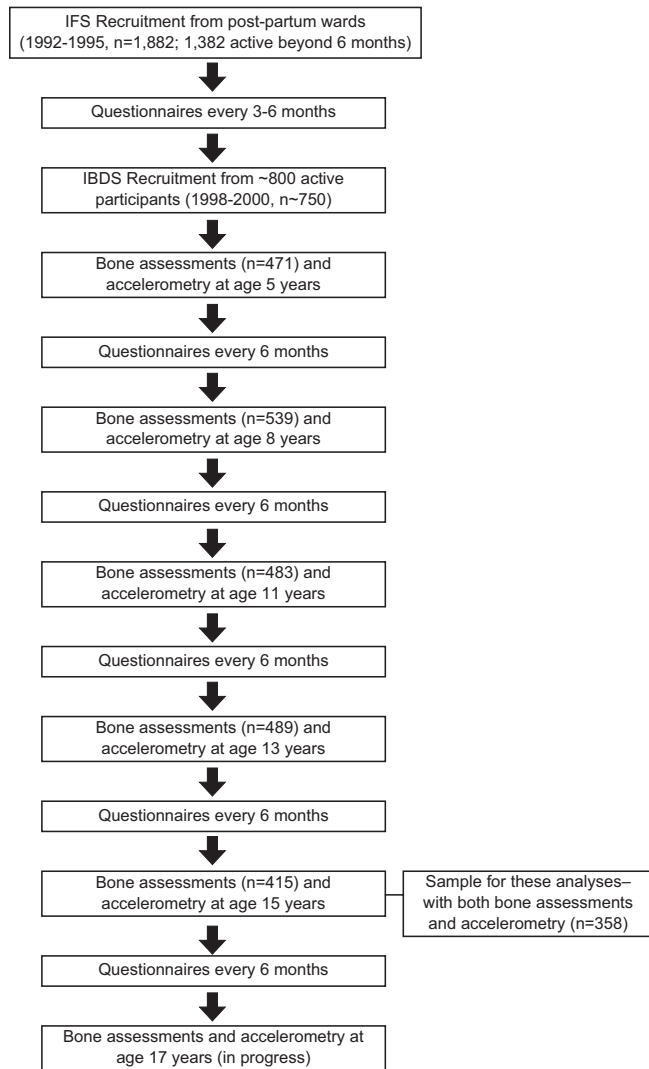

**Appendix Figure 1.** Iowa Fluoride Study (IFS)/Iowa Bone Development Study (IBDS) flowchart.

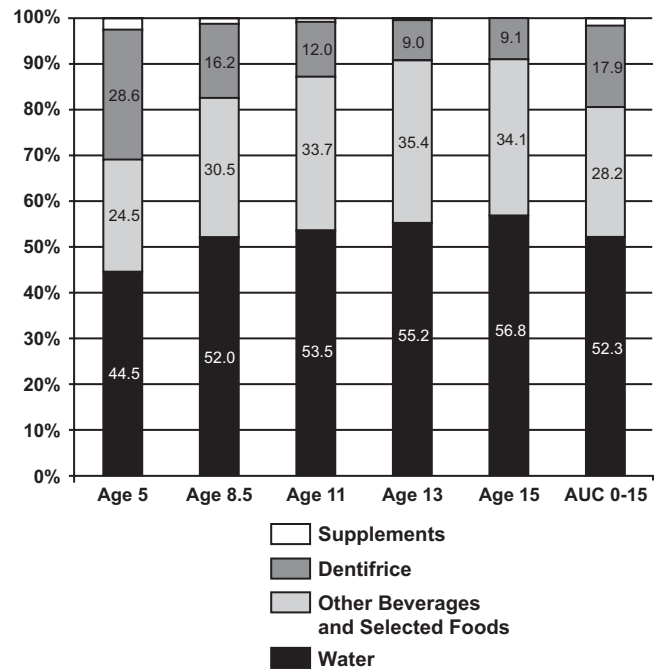

**Appendix Figure 2.** Mean percentages of fluoride intake from major sources (N = 358).
